# Functional Pathway Analysis Using SCNP of *FLT3* Receptor Pathway Deregulation in AML Provides Prognostic Information Independent from Mutational Status

Alessandra Cesano<sup>1\*</sup>, Santosh Putta<sup>1</sup>, David B. Rosen<sup>1</sup>, Aileen C. Cohen<sup>1</sup>, Urte Gayko<sup>1</sup>, Kavita Mathi<sup>1</sup>, John Woronicz<sup>1</sup>, Rachael E. Hawtin<sup>1</sup>, Larry Cripe<sup>2,3</sup>, Zhuoxin Sun<sup>2,4</sup>, Martin S. Tallman<sup>2,5</sup>, Elisabeth Paietta<sup>2,6</sup>

**1** Nodality, Inc., South San Francisco, California, United States of America, **2** Eastern Cooperative Oncology Group (ECOG), Boston, Massachusetts, United States of America, **3** Indiana University Simon Cancer Center, Indianapolis, Indiana, United States of America, **4** Dana-Farber Cancer Institute, Boston, Massachusetts, United States of America, **5** Memorial Sloan-Kettering Cancer Center, New York, New York, United States of America, **6** Montefiore Medical Center North Division, Bronx, New York, United States of America

## Abstract

FMS-like tyrosine kinase 3 receptor (*FLT3*) internal tandem duplication (ITD) mutations result in constitutive activation of this receptor and have been shown to increase the risk of relapse in patients with acute myeloid leukemia (AML); however, substantial heterogeneity in clinical outcomes still exists within both the ITD mutated and unmutated AML subgroups, suggesting alternative mechanisms of disease relapse not accounted by *FLT3* mutational status. Single cell network profiling (SCNP) is a multiparametric flow cytometry based assay that simultaneously measures, in a quantitative fashion and at the single cell level, both extracellular surface marker levels and changes in intracellular signaling proteins in response to extracellular modulators. We previously reported an initial characterization of *FLT3* ITD-mediated signaling using SCNP. Herein SCNP was applied sequentially to two separate cohorts of samples collected from elderly AML patients at diagnosis. In the first (training) study, AML samples carrying unmutated, wild-type *FLT3* (*FLT3* WT) displayed a wide range of induced signaling, with a fraction having signaling profiles comparable to *FLT3* ITD AML samples. Conversely, the *FLT3* ITD AML samples displayed more homogeneous induced signaling, with the exception of patients with low (<40%) mutational load, which had profiles comparable to *FLT3* WT AML samples. This observation was then confirmed in an independent (verification) cohort. Data from the second cohort were also used to assess the association between SCNP data and disease-free survival (DFS) in the context of *FLT3* and nucleophosmin (*NPM1*) mutational status among patients who achieved complete remission (CR) to induction chemotherapy. The combination of SCNP read outs together with *FLT3* and *NPM1* molecular status improved the DFS prediction accuracy of the latter. Taken together, these results emphasize the value of comprehensive functional assessment of biologically relevant signaling pathways in AML as a basis for the development of highly predictive tests for guidance of post-remission therapy.

**Citation:** Cesano A, Putta S, Rosen DB, Cohen AC, Gayko U, et al. (2013) Functional Pathway Analysis Using SCNP of *FLT3* Receptor Pathway Deregulation in AML Provides Prognostic Information Independent from Mutational Status. PLoS ONE 8(2): e56714. doi:10.1371/journal.pone.0056714

**Editor:** Zhuang Zuo, UT MD Anderson Cancer Center, United States of America

**Received:** October 12, 2012; **Accepted:** January 14, 2013; **Published:** February 19, 2013

**Copyright:** © 2013 Cesano et al. This is an open-access article distributed under the terms of the Creative Commons Attribution License, which permits unrestricted use, distribution, and reproduction in any medium, provided the original author and source are credited.

**Funding:** This study was funded by Nodality, Inc. The funder contributed to study design, data collection and analysis, decision to publish, and preparation of the manuscript.

**Competing Interests:** AC, SP, DBR, ACC, UG, JW, and REH are employees and shareholders of Nodality, Inc., the funder of this study. KM is a consultant for Nodality, Inc. LC, ZS, MST, and EP have no competing interests. There are no products in development or marketed products to declare; however, the authors have submitted two patents entitled "METHODS FOR DIAGNOSIS, PROGNOSIS, AND METHODS FOR TREATMENT" (Application # US 2011/0104717, Published May 5th, 2011 and Application # 14/293673, Filed November 22nd, 2012) on a subset of the findings. This does not alter the authors' adherence to all the PLOS ONE policies on sharing data and materials.

\* E-mail: Alessandra.Cesano@Nodality.com

## Introduction

FMS-like tyrosine kinase 3 receptor (*FLT3*) receptor mutations are among the most common somatic mutations in acute myeloid leukemia (AML), with *FLT3* internal tandem duplications (ITDs) occurring in 20–35% of adult AML [1,2,3,4,5,6,7] and ~5–15% of pediatric AML [8,9,10]. While the presence of *FLT3* ITD is not predictive of outcome to induction chemotherapy, it has consistently been shown to be associated with significantly shorter disease-free (DFS) and relapse-free survival [11]. The length of the

DNA insertion that constitutes the ITD varies among patient leukemia samples, with those that contain a high level of mutated to WT DNA ratio faring worse [2,12,13].

Nucleophosmin (*NPM1*) is a nucleolar phosphoprotein that is mutated in 25–35% of patients with AML and is associated with good prognosis, including in patients of advanced age [14,15,16]. Molecular characterization of the *FLT3* receptor and *NPM1* mutational status in cytogenetically normal AML has been incorporated into clinical guidelines based on correlations of these markers with overall survival [17]. Patients with *NPM1* mutation

but *FLT3* WT are thought to be of good prognostic risk, while *FLT3* ITD but *NPM1* WT patients are at high risk for disease relapse and should be considered for stem cell transplant (SCT) in first complete remission (CR). AML with *NPM1* WT/*FLT3* WT or carrying both *NPM1* mutation and *FLT3* ITD are considered to have intermediate-risk disease [17]. However, clinical heterogeneity remains in these cytogenetically and molecularly defined AML subgroups [18].

*FLT3* receptor mutations negatively affect outcome in AML, and kinase activity is already being targeted with kinase inhibitors in the clinic. Downstream targets of *FLT3* activation involve STAT5, PI3-kinase (PI3K)/AKT and the RAS/RAF/ERK kinase signal transduction pathways which ultimately affect cell survival and proliferation [19,20,21,22,23,24,25,26].

Previously, we reported the use of SCNP to functionally characterize *FLT3* signaling in healthy bone marrow (BM) and samples obtained from adult patients (<60 years) with AML [27]. AML carrying the *FLT3* ITD mutation demonstrated decreased *FLT3* ligand (*FLT3L*)-induced activation of the PI3K and RAS/RAF/ERK pathways, decreased IL-27-induced activation of the JAK/STAT pathway, and heightened apoptotic responses to agents inducing DNA damage [27] compared to healthy BM samples. In the same study, we also showed a relatively narrow range of signaling responses in *FLT3* ITD samples compared to *FLT3* WT AMLs suggesting that the latter represented a more heterogeneous and biologically distinct group of leukemias. On the basis of these observations we hypothesize that assessing patient samples for the presence of *FLT3* signaling deregulation may provide clinically relevant prognostic information that is independent of AML mutational status.

In the current study this hypothesis was tested and confirmed in two sequential cohorts (Fig. 1) using diagnostic samples from elderly patients ( $\geq 60$  years) with AML who participated in Eastern Oncology Cooperative Group (ECOG) 3999 [28] or 3993 [29] AML trials, which are comparable for the purpose of the analyses performed in the current study.

## Materials and Methods

### Ethics Statement

In accordance with the Declaration of Helsinki, all patients provided written informed consent for the collection and use of their samples for research purposes. Institutional Review Board approval was obtained from Independent Review Consulting, Inc. (Approval No. 09068-01) on August 31, 2009. Clinical data were

de-identified in compliance with Health Insurance Portability and Accountability Act regulations.

### Patient and sample characteristics

The first (training) study consisted of 46 cryopreserved bone marrow mononuclear cell (BMMC) samples collected at the time of diagnosis from patients  $\geq 60$  years of age with morphologically and immunophenotypically confirmed AML, enrolled in Phase 3 trial E3999. Samples included 38 *FLT3* WT and 8 *FLT3* ITD AML. The second (verification) study consisted of 104 cryopreserved BMMC samples collected from patients  $\geq 60$  years old enrolled in Phase 3 trials E3999 or E3993 for whom ITD mutational status (including % mutational load), response and DFS were available (Fig. 1). These included 85 *FLT3* WT and 19 *FLT3* ITD AML, 29 and 10 of which, respectively, were collected from patients who achieved complete remission (CR). Both trials excluded *PML/RAR $\alpha$*  positive acute promyelocytic leukemia.

Samples were collected prior to the initiation of anthracycline/cytarabine (Ara-C)-based induction chemotherapy and BMMC were cryopreserved in the ECOG Leukemia Tissue Bank until release for this study. The sample sets used for the present study represent a subset of the subjects enrolled on the ECOG studies which were selected based on the availability of stored aliquots of BMMC samples. In order to be included in the experimental analysis, BMMC specimens had to contain a minimum of 2 million viable cells post-thaw.

Based on data obtained in the training study, prespecified sample inclusion criteria for the verification study were modified to include sample quality elements and require that the percentage of leukemic (identified using CD45 and side scatter) cells that were cleaved PARP (cPARP) negative (non-apoptotic leukemic cells) was greater than 25% at the 15 minute time point (minimum cell health criteria, see Flow cytometry data acquisition below for further explanation) and that molecular assay data, including percentage of mutational load for the *FLT3* ITD samples, was also available.

Healthy BMMC ( $n = 6$ ) were obtained from patients at the time of hip replacement surgery from Williamson Medical Center (TN). These samples (5 male, 1 female) were from predominately Caucasian donors who ranged in age from 60–87 years, (median = 71 years).

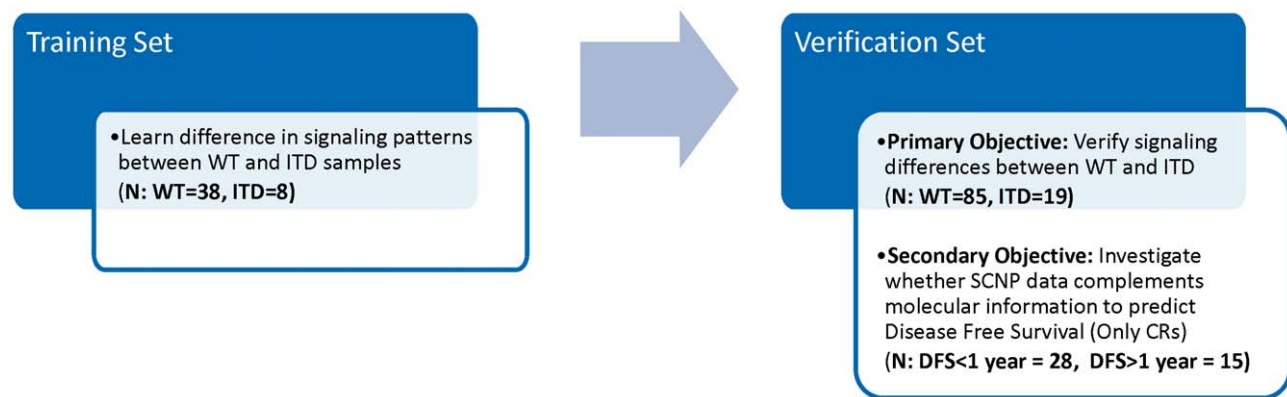

**Figure 1. Study Design Diagram.** Influence of *FLT3* ITD mutation status on functional signaling was studied in two independent data sets; observations made in the first set (training, N=46) were verified in the second set (Verification, N=104). doi:10.1371/journal.pone.0056714.g001

**Table 1.** Clinical characteristics for training and verification sets.

| Variable                 | Categories               | Study 1: training          |                           |                  |      | Study 2: verification      |                            |                 |      |
|--------------------------|--------------------------|----------------------------|---------------------------|------------------|------|----------------------------|----------------------------|-----------------|------|
|                          |                          | <i>FLT3</i> ITD−<br>n = 38 | <i>FLT3</i> ITD+<br>n = 8 | All (%) n = 46   | P    | <i>FLT3</i> ITD−<br>n = 85 | <i>FLT3</i> ITD+<br>n = 19 | All (%) n = 104 | P    |
| Age, years               | Median                   | 69.5                       | 70                        | 70               | 0.73 | 69                         | 66                         | 68              | 0.15 |
|                          | Range                    | 61–81                      | 61–74                     | 61–81            |      | 60–83                      | 61–79                      | 60–83           |      |
| Gender                   | Male                     | 23                         | 5                         | 28 (60.9)        | 1.00 | 46                         | 9                          | 55 (53)         | 0.62 |
|                          | Female                   | 15                         | 3                         | 18 (39.1)        |      | 39                         | 10                         | 49 (47)         |      |
| Cytogenetic risk         | Favorable                | 0                          | 0                         | 0 (0)            | 0.24 | 2                          | 1                          | 3 (3)           | 0.31 |
|                          | Intermediate             | 25                         | 8                         | 33 (71.7)        |      | 28                         | 5                          | 33 (31.7)       |      |
|                          | Unfavorable              | 11                         | 0                         | 11 (23.9)        |      | 26                         | 3                          | 29 (28)         |      |
|                          | Missing/unk              | 2                          | 0                         | 2 (4.3)          |      | 29                         | 10                         | 39 (37.5)       |      |
| Race                     | White                    | 36                         | 8                         | 44 (95.7)        | 1    | 81                         | 19                         | 100 (96)        | 1    |
|                          | Black                    | 2                          | 0                         | 2 (4.3)          |      | 4                          | 0                          | 4 (4)           |      |
| Disease                  | De novo                  | 12                         | 2                         | <b>14 (30.4)</b> | 1.00 | 56                         | 14                         | <b>70 (67)</b>  | 0.9  |
|                          | Secondary                | 24                         | 6                         | <b>30 (65.2)</b> |      | 25                         | 5                          | <b>30 (29)</b>  |      |
|                          | RAEB-t                   | 2                          | 0                         | 2 (4.3)          |      | 3                          | 0                          | 3 (3)           |      |
|                          | RAEB                     | 0                          | 0                         | 0 (0)            |      | 1                          | 0                          | 1 (1)           |      |
| WBC                      | 30 000 or less           | 21                         | 4                         | 25 (54.3)        | 1    | 56                         | 11                         | 67 (64)         | 0.59 |
|                          | Greater than 30 000      | 17                         | 4                         | 21 (45.7)        |      | 29                         | 8                          | 37 (36)         |      |
|                          | Median ( $\times 10^3$ ) | 23.35                      | 26.9                      | 23.35            | 0.82 | 15.3                       | 26.8                       | 16              | 0.31 |
|                          | Range ( $\times 10^3$ )  | 1.8–158.7                  | 3.4–91.1                  | 1.8–158.7        |      | 1.4–120.2                  | 5.4–97.7                   | 1.4–120.2       |      |
| <i>NPM1</i> -mutated AML | Yes                      | 10                         | 4                         | 14 (30.4)        | 0.48 | 24                         | 8                          | 32 (31)         | 0.28 |
|                          | No                       | 26                         | 4                         | 30 (65.2)        |      | 61                         | 11                         | 72 (69)         |      |
|                          | Unknown                  | 2                          | 0                         | 2 (4.3)          |      | 0                          | 0                          | 0 (0)           |      |

Bold text indicates fields that are significantly different between the training and verification sets.

WBC indicates white blood cell; *NPM1*, nucleophosmin 1; RAEB-t, refractory anemia with excess blasts in transformation; and RAEB, refractory anemia with excess blasts. doi:10.1371/journal.pone.0056714.t001

### SCNP assay

SCNP assays were performed as described previously [27,30,31]. Thawed cells were stained with Aqua Viability Dye to distinguish non-viable cells. For apoptosis assays, cells were incubated with cytotoxic drugs for 6 hours (staurosporine) or 24 hours (etoposide or Ara-C and daunorubicin) and re-stained with Aqua Viability Dye. For all other assays, cells were incubated with modulators (Table S1A) at 37°C for 5–15 minutes. After exposure to modulators, cells were fixed and permeabilized as previously reported [27,30,31]. Subsequently, cells were stained with cocktails of fluorochrome-conjugated antibodies (Table S1B), against 2 to 5 phenotypic markers for cell population gating and up to 3 antibodies against intracellular signaling molecules for an 8-color flow cytometry assay. Isotype controls (for surface marker antibodies) or phosphopeptide blocking (for antibodies against intracellular signaling molecules) were included as part of the characterization of each of the antibodies used in the assay. Due to insufficient number of cells for one sample in the training study SCNP data could not be collected for all conditions; as a result data is available for either 7 or 8 *FLT3* ITD donors depending on the condition tested.

### Signaling pathways evaluated

Modulated cell signaling pathways previously shown to be associated with *FLT3* ITD mutational status were examined [27]. These included: a) SCF and FLT3L-mediated activation of the PI3K/AKT or RAS/RAF/ERK pathway which each contributes

to the survival and proliferation of AML blast cells [32,33,34] and is important for maintaining the hematopoietic stem cell pool [35,36]; b) G-CSF and IL-27-mediated activation of the JAK/STAT pathway, whose proliferative and survival properties likely plays a central role in AML leukemogenesis as well as clinical resistance/refractoriness to genotoxic agents [37,38,39,40]; and c) staurosporine, etoposide, or Ara-C/daunorubicin-mediated induction of DNA damage and apoptosis pathways after *in vitro* exposure (transformed cells can evade apoptosis by activating survival pathways and/or disabling apoptotic pathways) [41].

### Flow cytometry data acquisition

Flow cytometry data were acquired on an LSR II and/or CANTO II flow cytometer using the FACS DIVA software (BD Biosciences, San Jose, CA) and analyzed with WinList (Verity House Software, Topsham, ME). Dead cells and debris were excluded by forward scatter (cell size), side scatter (granularity), and Amine Aqua Viability Dye measurement. Leukemic cells and normal myeloblasts were identified as cells that fit the CD45 versus right-angle light-scatter characteristics of myeloblasts [42]. Additional phenotypic markers (CD34, CD11b, CD15) were used to clarify the leukemic population. Non-apoptotic leukemic cells were identified as leukemic cells negative for cPARP, an activated caspase target. Previous data demonstrated that SCNP signaling responses are robust in non-apoptotic cPARP negative cells but not in apoptotic cPARP positive cells [43], and that AML samples with less than 25% cPARP negative leukemic cells are generally

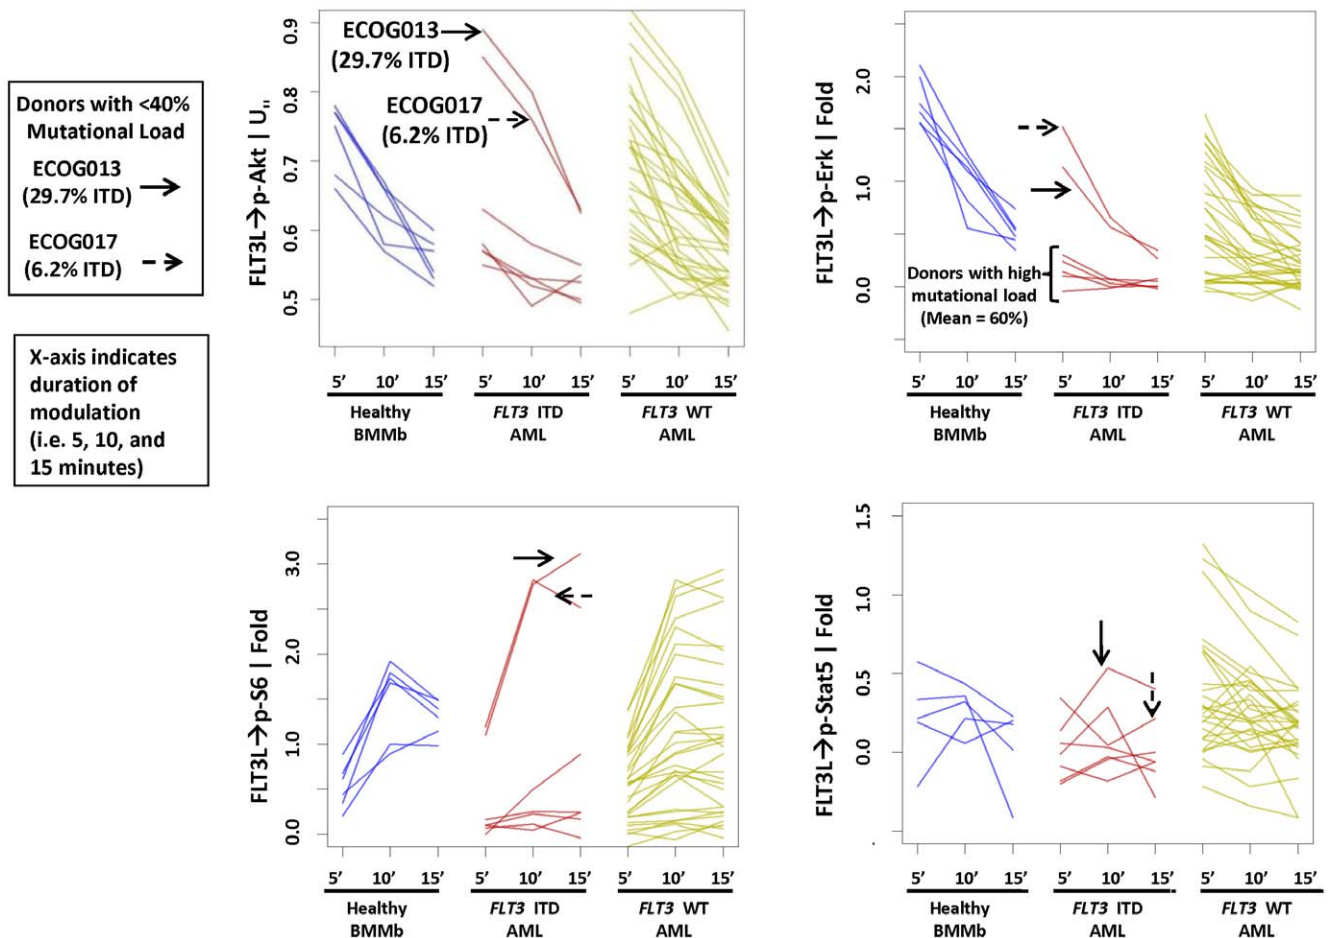

**Figure 2. Muted *FLT3L*-induced signaling in *FLT3* ITD samples.** (A) *FLT3* ITD samples demonstrate lower *FLT3L*-induced PI3K, RAS and STAT signaling. Time-course of *FLT3L*-induced signaling of p-S6 (lower left), p-ERK (upper right), p-AKT (upper left), and p-STAT5 (lower right) at 5, 10 and 15 min time points in healthy bone marrow myeloblasts (BMMb) (left), and leukemic blasts from AML donors with (middle) or without (right) *FLT3* ITD mutation. Donors with low mutational load (<40%) are identified with an arrow. doi:10.1371/journal.pone.0056714.g002

not analyzable for signaling responses [44]. Thus, our current analyses include a “sample quality” cutoff of at least 25% cPARP negative leukemic cells and a measurement of SCNP signaling responses limited (by gating) to cPARP negative leukemic cells to control for sample quality differences among individual AML samples. Of note, the percentage of non-apoptotic leukemic cells was not statistically different between *FLT3* WT and any of the *FLT3* ITD groups both in variance (using Levene Test) or magnitude (using student’s t-test) (data not shown). Healthy bone marrow myeloblasts (BMMb) were identified in BMMC samples using right-angle light scatter and surface markers such as CD45 and CD34.

### Metrics

In SCNP assay terminology, a “signaling node” is used to refer to a proteomic readout in the presence or absence of a specific modulator. For example, the response to *FLT3L* treatment can be measured using p-AKT as a readout. That signaling node is designated “*FLT3L*→p-AKT”. The normalized assay readouts for surface and intracellular markers are evaluated using metrics that are applied to interpret the functionality and biology of each signaling node. They are referenced following the node e.g.

“*FLT3L*→p-AKT | Fold”, “G-CSF→p-STAT5 | Total” and are defined in detail below.

Median fluorescence intensity (MFI) was computed for each node from cell fluorescence intensity levels. Equivalent Number of Reference Fluorophores (ERF) [45,46,47], a transformed value of the MFI value, was computed using a calibration line determined by fitting observations of a standardized set of 8-peak rainbow beads for all fluorescent channels (Spherotech Libertyville, IL; Cat. No. RFP-30-5A) to standard values assigned by the manufacturer.

The ERF values were then used to compute a variety of metrics to quantify functional changes in signaling proteins as follows (see also Fig. S1): A) Basal ERF (“Basal”): defined as  $\log_2(\text{ERF}_{\text{Unmodulated}}/\text{ERF}_{\text{Autofluorescence}})$  to measure basal levels of signaling in the resting, unmodulated cells; B) Fold Change ERF (“Fold”): defined as  $\log_2(\text{ERF}_{\text{Modulated}}/\text{ERF}_{\text{Unmodulated}})$  to quantify the responsiveness of a protein or pathway to a specific modulator; C) Total Phospho ERF (“Total”): defined as  $\log_2(\text{ERF}_{\text{Modulated}}/\text{ERF}_{\text{Autofluorescence}})$  to assess the magnitude of total activated protein after modulation; D)  $U_{ii}$  metric, which is the Mann-Whitney U statistic comparing the fluorescence intensity values of the modulated and unmodulated cells scaled to the unit interval (0,1), was used to assess the proportion of cells which showed modulated signal; E)  $U_a$  metric, (comparing ranking of the antibody stained cells in the modulated state vs. autofluorescence)

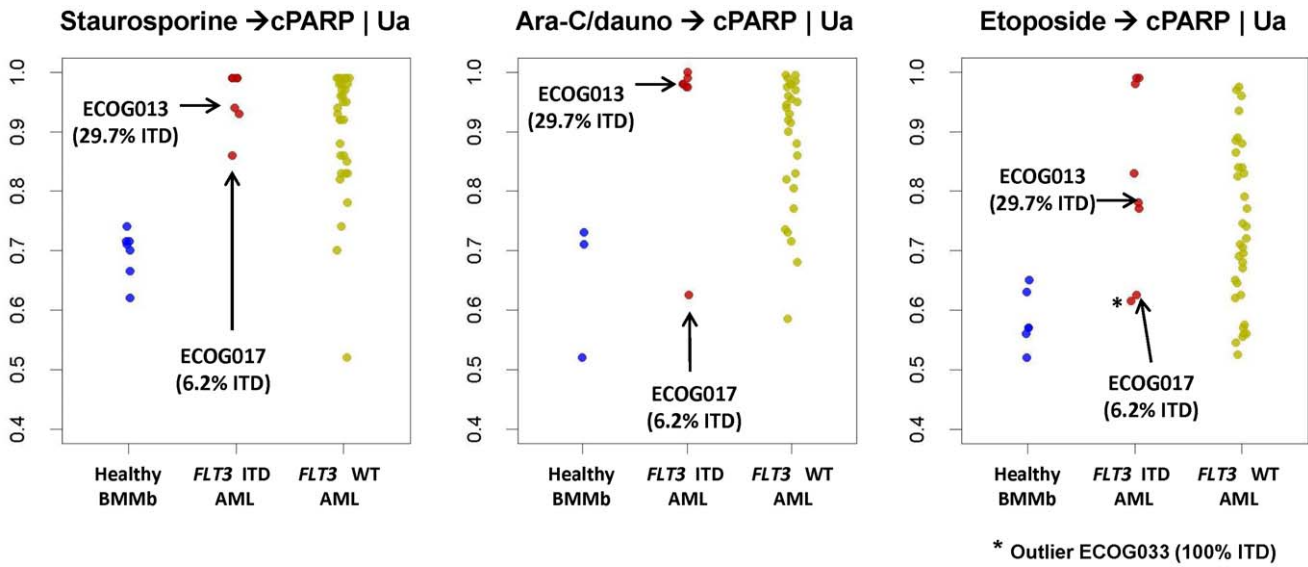

Donors with < 40% mutational load are indicated with arrows.

**Figure 3. *In vitro* apoptosis responses in *FLT3* ITD samples.** Staurosporine→cPARP U<sub>a</sub> metric (left graph), Ara-C/Daunorubicin→cPARP U<sub>a</sub> metric (middle graph), and etoposide→cPARP U<sub>a</sub> metric (right graph) for healthy (left), *FLT3* ITD (middle) and *FLT3* WT (right) bone marrow. Samples with low mutational load (<40%) are identified with an arrow. doi:10.1371/journal.pone.0056714.g003

was used to quantify the percentage of cells showing signal induction post-modulation. Finally, for surface markers, the Percent Positive (“PercentPos”) was used to quantify the frequency of cells positive for a surface marker relative to a control antibody. For measures of induced signaling, one metric per node was generally used as Fold and U<sub>a</sub> metrics gave highly concordant

results (Average Pearson R: 0.92 for the nodes studied, data not shown). For short term signaling, the the Fold metric wastipically used based on the potentially higher dynamic range of this metric with the exception of p-AKT intracellular readout (measured in the Alexa Fluor AF647 channel) which displayed low (near zero in unmodulated wells) absolute median intensity values which

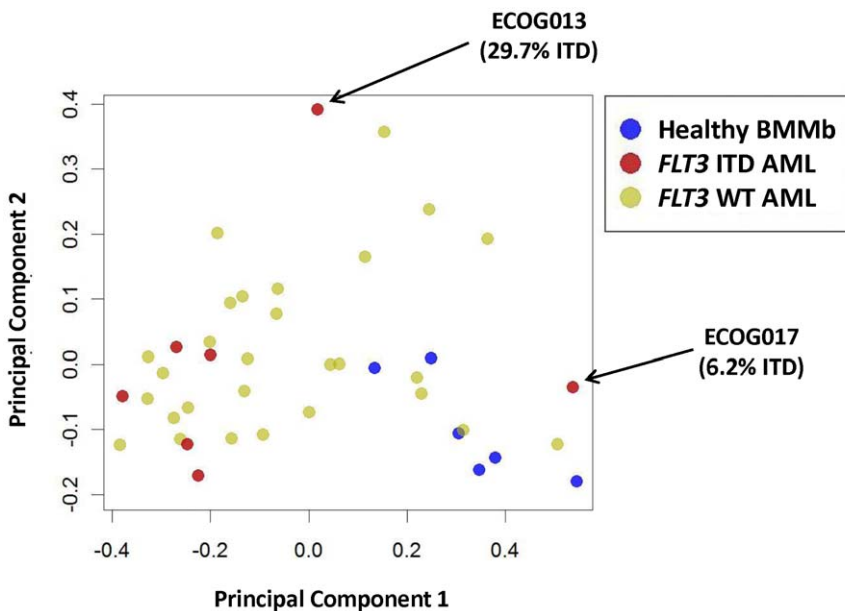

Donors with < 40% mutational load are indicated with arrows.

**Figure 4. PCA pathway analysis of *FLT3* ITD AML samples and healthy BMMb compared to *FLT3* WT AML.** PCA analysis of *FLT3*L-induced signaling (PC 1) and AraC/Daunorubicin-induced apoptosis measured by cPARP (PC 2) in healthy BMMb (blue dots), *FLT3* ITD (red dots) and *FLT3* WT (green dots). Donors with low *FLT3* ITD mutational load (<40%) are indicated by arrows. doi:10.1371/journal.pone.0056714.g004

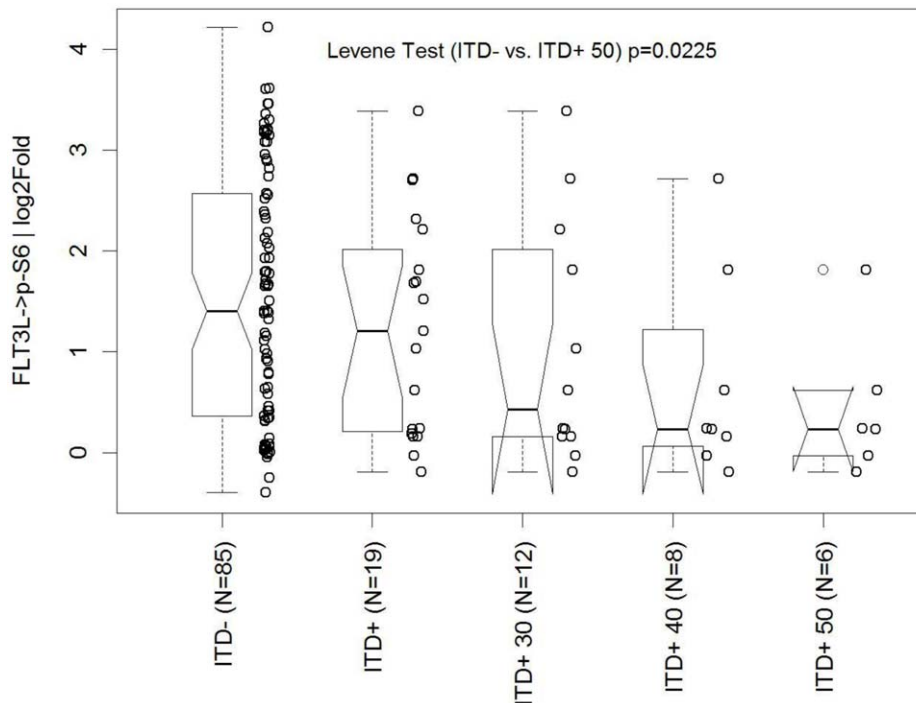

**Figure 5. Comparison of *FLT3* ITD signaling versus *FLT3* WT signaling.** Box and whisker plots of FLT3L-induced p-S6 with the log<sub>2</sub>fold metric in increasing mutational load (ITD-[*FLT3* WT]=0%, ITD+[*FLT3* ITD]≥0%, ITD+30≥30%, ITD+40≥40%, ITD+50≥50% ITD, respectively). This is the primary objective analysis.

doi:10.1371/journal.pone.0056714.g005

contribute to less reproducible Fold metrics. A rank based metric  $U_u$  which approximates the proportion of cells that were induced was found (based on reproducibility data) to be more robust in such situations. Similarly, apoptosis readouts were measured using rank based  $U_u$  or  $U_a$  metrics which approximate the proportion of cells undergoing apoptosis and were previously found to be more stable than metrics based on the absolute levels of cPARP staining or Fold metrics (data not shown).

#### Analysis of *FLT3* receptor mutational status and load

An aliquot of cells was taken from each sample to isolate DNA and RNA using TRIzol Reagent (Invitrogen) as described by the manufacturer. For the analysis of *FLT3* ITD, PCR was performed on 500 ng genomic DNA using published primers 11F and 12R to identify ITD insertions in the JM and TK1 domains [48] using AmpliTaq Gold DNA polymerase (Applied Biosystems). *FLT3* ITD mutational load was determined using densitometry analysis software (Image J) quantifying the percentage of *FLT3* ITD mutant PCR signal intensity from DNA electrophoresis gels.

#### Analysis of *NPM1* mutational status

Real-time quantitative PCR assays for *NPM1* mutations A and B were performed to analyze the *NPM1* mutational status. RQ-PCR was performed on 100 ng cDNA using published Taqman primers for mutation A (cNPM-F and cNPMmutA-R) or mutation B (cNPM-F and cNPM-mutB-R) and a common probe (c.Probe), as described [49]. A 35 cycle threshold cutoff was used to identify samples positive for the *NPM1* mutation.

#### Principle component analysis

Principle component analysis [50] was performed using the R Software package (version 2.13.0) to combine multiple nodes

(dimensions) belonging to FLT3L, IL-27-induced signaling and etoposide-induced apoptosis measured by the  $U_u$  metric. The  $U_u$  metric gives each node an equivalent scale/range of signaling (from 0 to 1) which is preferable for PCA analysis. The first two principal components were then used to visually compare *FLT3* ITD, *FLT3* WT and Healthy BMMb sub-groups.

#### Statistical analysis: Verification of decrease in range of FLT3L-induced pS6 levels in *FLT3* ITD samples with increase in mutational load

Four sub-groups of *FLT3* ITD samples were pre-defined and specified prior to unblinding in the second study; those with any percentage of mutation (mutational load) (*FLT3* ITD+), those with mutational load greater or equal to 30% (*FLT3* ITD+ 30), 40% (*FLT3* ITD+ 40) or 50% (*FLT3* ITD+ 50). The variance in the range of FLT3L-induced pS6 levels observed in each of these sub-groups and *FLT3* WT samples was computed by using the median as the central measure. Levene's test for the equality of variance was applied to compare each of the *FLT3* ITD sub-groups with the *FLT3* WT group using the method 'levene.test' from the package 'lawstat' in the R software package (version 2.13.0). The p-value from the Levene's test is reported for each of the comparisons.

#### Statistical analysis: Analysis of association between SCNP data and DFS

Disease-free survival (DFS) was defined as the number of days from CR until relapse, death from any cause, or last contact and therefore is only applicable to patients who achieved CR.

All DFS modeling was performed as a continuous variable. Cox-proportional hazards regression was used to develop models for DFS using the package 'survival' in the R Software package (version 2.13.0). Due to the small size of the data set, the

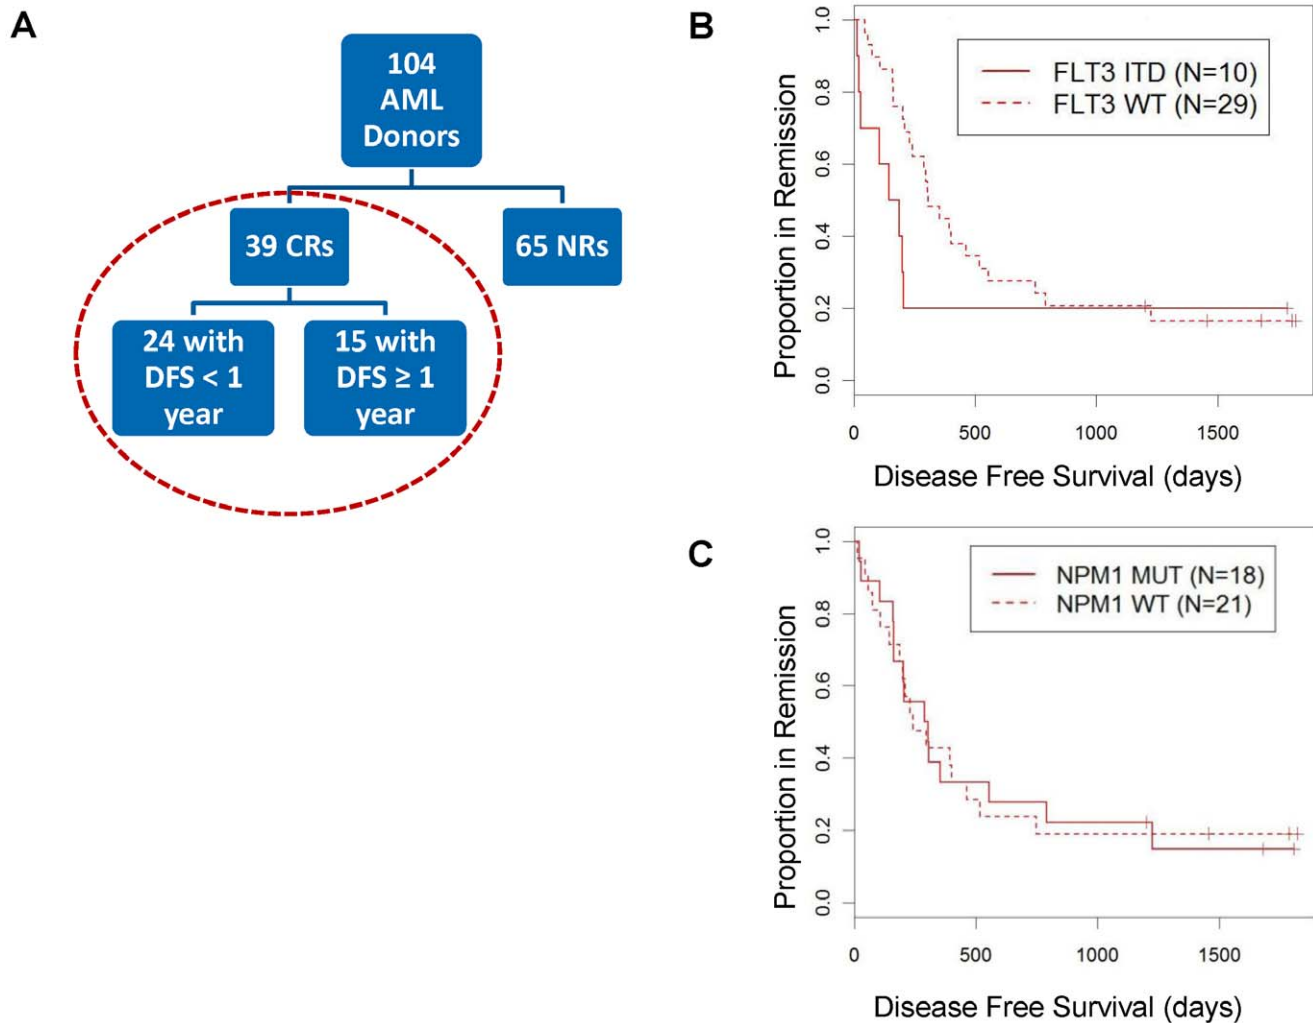

**Figure 6. Association of *FLT3* ITD and *NPM1* mutation with DFS.** (A) Patient cohort used for DFS modeling. (B) Cox-proportional hazards model for DFS using *FLT3* mutation data  $\log h(t) = \beta_0 + \beta_1 * FLT3$  ITD. Probability of DFS versus days of complete disease response (CR) for *FLT3* ITD AML samples (solid line) and *FLT3* WT samples (dotted line). (C) Cox-proportional hazards model for DFS using *NPM1* data  $\log h(t) = \beta_0 + \beta_1 * NPM1$  mutated. Probability of DFS versus days of complete disease response (CR) for *NPM1*-mutated AML samples (solid line) and *NPM1* WT samples (dotted line). doi:10.1371/journal.pone.0056714.g006

complexity of these models was limited to combining only one SCNP node at a time with either the *FLT3* ITD mutational status or molecular classification along with an interaction term. Molecular classification combined *FLT3* and *NPM1* molecular status into a single coding of 1 for those patients with good prognosis (*FLT3* WT and *NPM1* MUT), 2 for those with

intermediate (*FLT3* WT and *NPM1* WT or *FLT3* ITD and *NPM1* MUT) and 3 for those with poor prognosis (*FLT3* ITD and *NPM1* WT). Additional modeling of DFS was also performed only among the patients with CR and *FLT3* WT, where two SCNP nodes (each of which represented a different pathway) were combined to model DFS. The p-value for the model (Wald test)

**Table 2. Clinical outcomes: verification cohort.**

| Variable                              | Range                             | <i>FLT3</i> ITD <sup>-</sup> | <i>FLT3</i> ITD <sup>+</sup> | All | <i>P</i> |
|---------------------------------------|-----------------------------------|------------------------------|------------------------------|-----|----------|
| Induction response                    | NR                                | 56                           | 9                            | 65  | 0.19     |
|                                       | CR                                | 29                           | 10                           | 39  |          |
| Post Remission Response (CR Patients) | Relapse or died within 1 year     | 16                           | 8                            | 24  | 0.20     |
|                                       | Continued CR for 1 year or longer | 13                           | 2                            | 15  |          |

Fisher's exact test was applied to categorical variables.  
NR indicates non-responder; and CR, complete responder.  
doi:10.1371/journal.pone.0056714.t002

**Table 3.** Clinical characteristics: verification cohort (CR only).

| Variable                | Categories               | DFS Less than 1 year n = 24 | DFS 1 year or greater n = 15 | All CR n = 39 | P     |
|-------------------------|--------------------------|-----------------------------|------------------------------|---------------|-------|
| Age (years)             | Median                   | 65.5                        | 69                           | 68            | 0.455 |
|                         | Range                    | 60–79                       | 62–78                        | 60–79         |       |
| Sex                     | Male                     | 11                          | 3                            | 14            | 0.019 |
|                         | Female                   | 13                          | 12                           | 25            |       |
| Cytogenetics*           | Favorable                | 1                           | 1                            | 2             | 0.015 |
|                         | Intermediate/Missing     | 18                          | 14                           | 32            |       |
|                         | Unfavorable              | 5                           | 0                            | 5             |       |
| Race                    | White                    | 23                          | 15                           | 38            | 0.231 |
|                         | Black                    | 1                           | 0                            | 1             |       |
| Secondary AML           | De novo                  | 19                          | 11                           | 30            | 0.112 |
|                         | Secondary                | 4                           | 4                            | 8             |       |
|                         | RAEB-t                   | 1                           | 0                            | 1             |       |
|                         | RAEB                     | 0                           | 0                            | 0             |       |
| WBC                     | 30 000 or less           | 15                          | 11                           | 26            | 0.592 |
|                         | Greater than 30 000      | 9                           | 4                            | 13            |       |
|                         | Median ( $\times 10^3$ ) | 15.05                       | 9.0                          | 14.65         | 0.254 |
|                         | Range ( $\times 10^3$ )  | 1.6–97.7                    | 1.4–53.6                     | 1.4–97.7      |       |
| <i>NPM1</i> mutated     | Yes                      | 12                          | 6                            | 18            | 0.982 |
|                         | No                       | 12                          | 9                            | 21            |       |
| <i>FLT3</i> ITD mutated | Yes                      | 8                           | 2                            | 10            | 0.200 |
|                         | No                       | 16                          | 13                           | 29            |       |

Modeling of DFS was performed only among patients who achieved CR to induction therapy. Each of the clinical co-variables, demographic characteristics and molecular characteristics was tested for association with DFS using logrank test. Logrank test was applied to compute p-values.

\*Cytogenetics was coded as continuous variable: Favorable = 1, Intermediate/Unknown = 2, Unfavorable = 3.

DFS indicates disease free survival; CR, complete responder; WBC, white blood cell; *NPM1* nucleophosmin 1; RAEB-t, refractory anemia with excess blasts in transformation; and RAEB, refractory anemia with excess blasts.

doi:10.1371/journal.pone.0056714.t003

and the p-value (slope = 0) for each of the components of the model are reported. In addition, within the CR and *FLT3* WT group, Cox-proportional hazard models for DFS with two SCNP nodes were built with *NPM1* mutation status or cytogenetics as an additional covariate to examine if the SCNP nodes remained significantly associated with DFS. This data set contained several patients with missing cytogenetics data; in particular among the CR group 5 patients were coded by ECOG as Unknown cytogenetics. For modeling purposes, patients with missing cytogenetics were considered intermediate-risk, as is standard in clinical practice[51,52]. A cytogenetics risk value was assigned to each patient: Favorable risk assigned 1; Intermediate, Unknown risk assigned 2; and Unfavorable risk assigned 3 to closely approximate risk assessments in a clinical setting. The models are also presented visually using Kaplan-Meier curves with the patients stratified by the model fit (i.e. applying the Cox model to the same data set); patients with a hazard ratio greater than 1.0 were plotted on the a curve labeled *Model+* and those with less than 1.0 were plotted on the curve labeled *Model-*.

## Results

### Clinical characteristics

The clinical and demographic characteristics of the patients from both the training and verification studies are shown in Table 1. Studies were matched across clinical variables with the

exception of a predominance of secondary AML in the training study (66% training vs. 29% test). None of the variables examined in either study, including age, gender, race, white blood cell count or blast percent at presentation, or *NPM1* mutational status were associated with *FLT3* ITD mutational status (Table 1).

### Training study

***FLT3* ITD samples show lower *FLT3L*-induced PI3K, RAS, and JAK signaling.** Similar to previous findings [27], *FLT3* receptor surface protein levels did not differ between *FLT3* WT and *FLT3* ITD samples (data not shown). Incubation of cells with *FLT3L* resulted in the phosphorylation (p) of S6, ERK, AKT, and STAT5 at 5, 10 and 15 minute time-points in healthy BMMb and leukemic blasts from AML with or without *FLT3* ITD mutation. Induced signaling in the *FLT3* ITD AML samples (N = 8) was muted except in patients with low (<40%) mutational load (Fig. 2). In contrast, signaling in *FLT3* WT AML samples (N = 38) showed a high level of heterogeneity, with some samples showing patterns of signaling similar to that of healthy BM and *FLT3* ITD AML (Fig. 2). Furthermore, in the training set it was observed that *FLT3L*-induced signaling in *FLT3* ITD AML was muted when the *FLT3* ITD mutational load is high for multiple readouts at all timepoints examined (Fig. 2);

***FLT3* ITD samples show high levels of apoptosis in response to drugs.** Apoptosis was evaluated as the proportion of cells that accumulated above the background of cPARP using



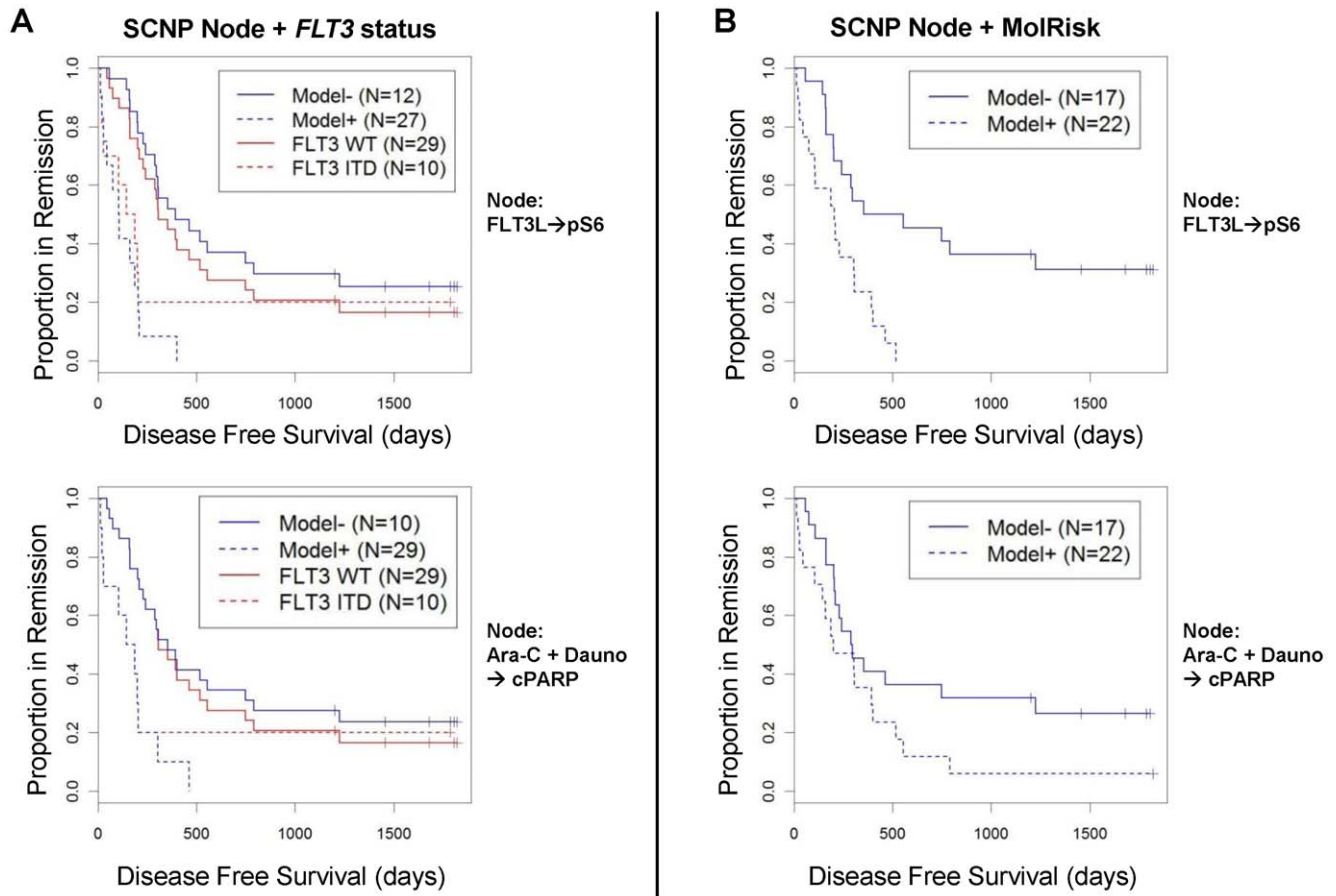

**Figure 7. SCNP models compared to *FLT3* mutational status or molecular risk groups in modeling DFS.** (A) Models for DFS based on SCNP readouts and *FLT3* mutational status allow for better separation of patients compared to modeling based on *FLT3* mutational status alone. The DFS of patients modeled based on SCNP readouts alone vs. combined with *FLT3* mutational status is shown by the blue lines (Model- vs. Model+) and DFS modeled based on *FLT3* mutational status only is shown by the red lines (*FLT3* WT vs. *FLT3* ITD). The SCNP model in the upper panel (blue lines) incorporates the SCNP node *FLT3L*→pS6 and in the lower panel incorporates the SCNP node Ara-C/Dauno→cPARP. (B) Models for DFS based on SCNP readouts and molecular risk group allow for clear separation of two patient groups. The DFS of patients modeled based on SCNP readouts alone vs. combined with molecular risk groups (3 groups) is shown by the blue lines (Model- vs. Model+). DFS modeled based only on molecular risk groups is not shown since it provides prediction into 3 groups. The SCNP model in the upper panel incorporates the SCNP node *FLT3L*→pS6 and in the lower panel the SCNP node Ara-C/Dauno→cPARP.  
doi:10.1371/journal.pone.0056714.g007

the  $U_a$  metric (Fig. 3). *FLT3* WT samples exhibited a broad range of apoptotic responses when incubated with either Staurosporine or Ara-C/Daunorubicin. Conversely, *FLT3* ITD containing samples behaved more uniformly and showed robust levels of cPARP after Staurosporine treatment, consistent with previous findings [27]. All *FLT3* ITD samples exhibited high levels of apoptosis after treatment with Ara-C/Daunorubicin except for a single sample that contained low (6.2%) mutational load. Similar results were seen in response to etoposide although an additional sample in the *FLT3* ITD group (ECOG-033, 100% ITD) displayed a low apoptosis response that was not explained by low mutational load (Fig. 3). While this trend of *FLT3* ITD samples showing higher and more homogeneous levels of total induced apoptosis as compared to *FLT3* WT samples was not significant in the training study, likely due to the low N of *FLT3* ITD samples with high mutational load, the difference in variance between *FLT3* subgroups was statistically significant in the verification study (Levene's test  $P=0.011$  or  $0.010$  for Ara-C/dauno and etoposide).

**Principal Component Analysis (PCA) demonstrates homogeneity of *FLT3* ITD AML across multiple**

**pathways.** PCA was used to combine information across multiple nodes, i.e. *FLT3L*-mediated induction of p-AKT, p-S6, p-ERK, and p-STAT5, IL-27-mediated induction of p-STAT1, p-STAT3 and p-STAT5, and etoposide-induced p-Chk2 and cPARP. Inspection of the first two principal components showed distinct signaling patterns among the three groups of samples: *FLT3* ITD AML, *FLT3* WT AML and healthy BMMb (Fig. 4). Both healthy BMMb samples and *FLT3* ITD samples (with the exception of samples with mutation load <40%) formed tight but distinct clusters, suggesting tightly regulated, though discrete, signaling across these pathways. The *FLT3* WT AML samples, on the other hand, spanned a wide range of signaling and did not display distinct clusters, overlapping both the signaling patterns of the healthy BMMb and *FLT3* ITD samples.

Due to the small number of *FLT3* ITD patients in the training study, association with clinical outcomes could not be performed in this set.

#### Verification Study

**Primary Objective: Verification of decrease in range of *FLT3L*-induced signaling with increasing mutational load**

**Table 4.** Nodes in combination with *FLT3* mutation improve DFS modeling.

| Population            | Modulator  | Modulation time, minutes | Antibody | Metric                | <i>P</i> model*‡ | <i>P</i> node <sup>†</sup> | <i>P</i> <i>FLT3</i> MUT <sup>†</sup> | <i>P</i> interaction term <sup>†  </sup> |
|-----------------------|------------|--------------------------|----------|-----------------------|------------------|----------------------------|---------------------------------------|------------------------------------------|
| Leukemic <sup>§</sup> | FLT3L      | 10                       | p-S6     | log <sub>2</sub> fold | 0.038            | 0.034                      | 0.736                                 | 0.141                                    |
|                       | FLT3L      | 15                       | p-S6     | log <sub>2</sub> fold | 0.009            | 0.010                      | 0.805                                 | 0.077                                    |
|                       | G-CSF      | 15                       | p-STAT3  | log <sub>2</sub> fold | 0.147            | 0.090                      | 0.714                                 | 0.169                                    |
|                       | PMA        | 15                       | p-ERK    | log <sub>2</sub> fold | 0.004            | 0.005                      | 0.252                                 | 0.019                                    |
|                       | PMA        | 15                       | p-S6     | log <sub>2</sub> fold | 0.002            | 0.003                      | 0.302                                 | 0.009                                    |
|                       | SCF        | 15                       | p-S6     | log <sub>2</sub> fold | 0.030            | 0.020                      | 0.899                                 | 0.089                                    |
| Leukemic              | AraC+Dauno | 1440                     | CD34     | U <sub>u</sub>        | 0.005            | 0.006                      | 0.064                                 | 0.013                                    |
|                       | AraC+Dauno | 1440                     | cPARP    | U <sub>u</sub>        | 0.001            | 0.002                      | 0.007                                 | 0.002                                    |
|                       | AraC+Dauno | 1440                     | p-Chk2   | U <sub>u</sub>        | 0.036            | 0.024                      | 0.064                                 | 0.034                                    |
|                       | Etoposide  | 1440                     | cPARP    | U <sub>u</sub>        | 0.012            | 0.011                      | 0.025                                 | 0.010                                    |
|                       | Etoposide  | 1440                     | p-Chk2   | U <sub>u</sub>        | 0.205            | 0.157                      | 0.263                                 | 0.196                                    |

The table displays the *p*-values for the models (*P* model) as well as the components: node (*P* node), *FLT3* ITD status (*P* *FLT3* MUT), and the interaction term (*P* interaction term).

p-S6 indicates phosphorylated S6 ribosomal protein; G-CSF, granulocyte colony-stimulating factor; p-STAT3, phosphorylated signal transducer and activator of transcription 3; PMA, phorbol myristate acetate; p-ERK, phosphorylated endoplasmic reticulum kinase; SCF, Skp, Cullin, F-box containing complex; CD34, cluster of differentiation 34; cPARP, cleaved poly(ADP-ribose) polymerase; and p-Chk2, phosphorylated checkpoint 2 protein kinase.

Sample size *n* = 39 for each row.

\*Wald test used.

<sup>†</sup>t-test (H0:Slope=0). Significant *p*-value suggests influence of model component on hazard ratio.

<sup>‡</sup>Log of hazard ratio fit of mutation data plus node with interaction term using Cox Proportional -hazards regression model:  $\log h(t) = \beta_0 + \beta_1 * FLT3 ITD + \beta_2 * node + \beta_3 * node * FLT3 ITD$ .

<sup>§</sup>Signaling examined in non-apoptotic leukemic cells (cPARP negative).

<sup>||</sup>Interaction term included in model to evaluate simultaneous influence of mutation and node on hazard ratio.

doi:10.1371/journal.pone.0056714.t004

**among *FLT3* ITD samples.** In order to verify the finding that signaling was more homogeneous in *FLT3* ITD than *FLT3* WT AML, we chose to analyze the variance of FLT3L-induced p-S6

signaling as the primary study objective, a common and relevant downstream readout in the *FLT3* receptor signaling pathway. Sub-groups were defined based on the *FLT3* ITD mutational load:

**Table 5.** Nodes in combination with molecular characterization improve DFS modeling.

| Population            | Modulator  | Modulation time, minutes | Antibody | Metric                | <i>P</i> Model*‡ | <i>P</i> Node <sup>†</sup> | <i>P</i> MolChar <sup>†</sup> | <i>P</i> interaction term <sup>†  </sup> |
|-----------------------|------------|--------------------------|----------|-----------------------|------------------|----------------------------|-------------------------------|------------------------------------------|
| Leukemic <sup>§</sup> | FLT3L      | 10                       | p-S6     | log <sub>2</sub> fold | 0.027            | 0.090                      | 0.191                         | 0.025                                    |
|                       | FLT3L      | 15                       | p-S6     | log <sub>2</sub> fold | 0.007            | 0.059                      | 0.242                         | 0.012                                    |
|                       | G-CSF      | 15                       | p-STAT3  | log <sub>2</sub> fold | 0.108            | 0.158                      | 0.681                         | 0.054                                    |
|                       | PMA        | 15                       | p-ERK    | log <sub>2</sub> fold | 0.023            | 0.083                      | 0.134                         | 0.021                                    |
|                       | PMA        | 15                       | p-S6     | log <sub>2</sub> fold | 0.003            | 0.015                      | 0.096                         | 0.002                                    |
|                       | SCF        | 15                       | p-S6     | log <sub>2</sub> fold | 0.038            | 0.195                      | 0.519                         | 0.042                                    |
| Leukemic              | AraC+Dauno | 1440                     | CD34     | U <sub>u</sub>        | 0.004            | 0.008                      | 0.006                         | 0.001                                    |
|                       | AraC+Dauno | 1440                     | cPARP    | U <sub>u</sub>        | 0.018            | 0.032                      | 0.012                         | 0.006                                    |
|                       | AraC+Dauno | 1440                     | p-Chk2   | U <sub>u</sub>        | 0.068            | 0.055                      | 0.029                         | 0.019                                    |
|                       | Etopo      | 1440                     | cPARP    | U <sub>u</sub>        | 0.030            | 0.045                      | 0.018                         | 0.009                                    |
|                       | Etopo      | 1440                     | p-Chk2   | U <sub>u</sub>        | 0.132            | 0.098                      | 0.057                         | 0.042                                    |

The table displays the *p*-values for the models (*P* Model) as well as the components: node (*P* Node), molecular characterization (*P* MolChar), and the interaction term (*P* interaction term).

p-S6 indicates phosphorylated S6 ribosomal protein; G-CSF, granulocyte colony-stimulating factor; p-STAT3, phosphorylated signal transducer and activator of transcription 3; PMA, phorbol myristate acetate; p-ERK, phosphorylated endoplasmic reticulum kinase; SCF, Skp, Cullin, and F-box containing complex; CD34, cluster of differentiation 34; cPARP, cleaved poly(ADP-ribose) polymerase; and p-Chk2, phosphorylated checkpoint 2 protein kinase.

Sample size *n* = 39 for each row

\*Wald test used.

<sup>†</sup>t-test (H0:Slope=0). Significant *p*-value suggests influence of model component on hazard ratio.

<sup>‡</sup>Log of hazard ratio fit of MolChar plus node with interaction term using Cox Proportional -hazards regression:  $\log h(t) = \beta_0 + \beta_1 * FLT3 ITD + \beta_2 * node + \beta_3 * node * FLT3 ITD$ .

<sup>§</sup>Signaling examined in non-apoptotic Leukemic cells (cPARP negative).

<sup>||</sup>Interaction term included in model to evaluate simultaneous influence of MolChar and node on hazard ratio.

doi:10.1371/journal.pone.0056714.t005

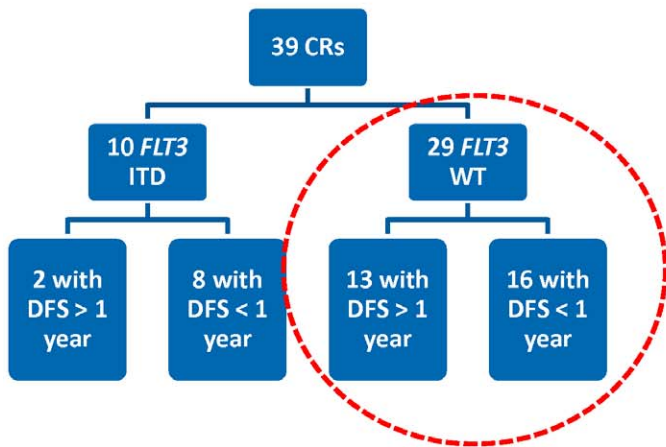

Model:  
 $\log h(t) = \beta_0 + \beta_1 * \text{Node1} + \beta_2 * \text{Node2}$

Node1 : Etoposide→cPARP |  $U_u$   
 Node2 : FLT3L→p-S6 |  $\log_2\text{Fold}$

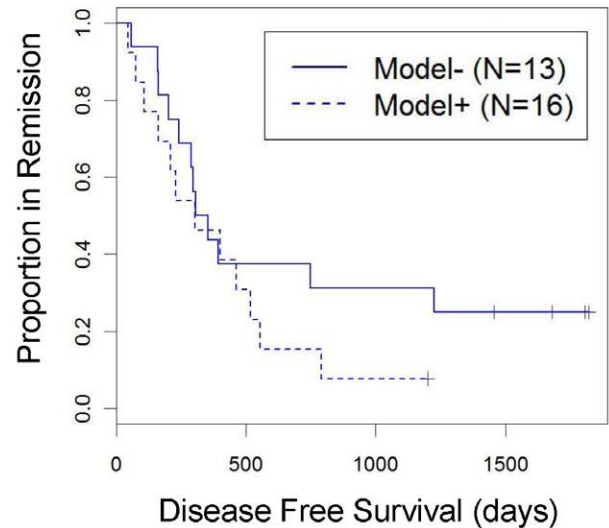

**Figure 8. Multivariate model in *FLT3* WT AML donors using combination of SCNP nodes: association with DFS.** Association of SCNP readouts from apoptosis (Etoposide→cPARP |  $U_u$ ) and proliferation (FLT3L→p-S6 |  $\log_2\text{Fold}$ ) pathways with DFS in a multivariate model among the patients with AML and *FLT3* WT disease (n = 29).  
 doi:10.1371/journal.pone.0056714.g008

those with 0% ITD (*FLT3* WT, N = 85), those with measurable *FLT3* ITD levels (*FLT3* ITD+, N = 19), and inside the latter group, those with  $\geq 30\%$  (*FLT3* ITD+ 30, N = 12),  $\geq 40\%$  (*FLT3* ITD+ 40, N = 8) and  $\geq 50\%$  (*FLT3* ITD+ 50, N = 6) mutational load. Variance of signaling was pre-specified to be largest in the *FLT3* WT group followed in order by *FLT3* ITD+, *FLT3* ITD+ 30, *FLT3* ITD+ 40, and least in *FLT3* ITD+ 50. After unblinding clinical and mutational data, the results confirmed that in the verification sample set the FLT3L-induced p-S6 responses were muted and more homogeneous in *FLT3* ITD AML samples with high mutational load compared to *FLT3* WT AML (Fig. 5). Specifically, variance was largest in the *FLT3* WT group followed by the four defined *FLT3* ITD+ sub-groups in increasing order of mutational load. Variance in the *FLT3* WT group was significantly (Levene Test  $p = 0.023$ ) different from the *FLT3* ITD+ 50 group and marginally (Levene Test  $p = 0.097$ ) different from the *FLT3* ITD+ 40 group (Fig. 5).

**Secondary Objective: Association of SCNP node-metrics with DFS in patients with complete response.** In the

verification study, 65 patients had disease that was unresponsive (NR), while 39 patients experienced CR after induction chemotherapy; 37% of these CRs remained disease-free for at least one year (Fig. 6A and Table 2). The SCNP node-metric data from CR patients were combined with *FLT3* ITD and *NPM1* mutational status to identify associations between SCNP node-metrics and DFS using Cox-proportional hazards regression modeling. In this sample set, cytogenetics and gender were associated with DFS ( $p = 0.015$  and  $0.019$ , respectively, Table 3). *FLT3* and *NPM1* mutational status, age and secondary AML were not statistically significantly associated with DFS (Table 3 and Fig. 6B, 6C), although samples carrying *FLT3* ITD showed the expected trend of separation of survival curves (Fig. 6B).

**Accuracy of model for DFS improves when SCNP data and molecular characterization are combined.** We first examined whether combining signaling nodes with *FLT3* mutational status improved DFS modeling. Given the small size of the data set, the complexity of the models was limited. Each regression model included a single node-metric term, *FLT3* ITD status, and

**Table 6.** SCNP nodes likely contribute unique data for the prediction of DFS in *FLT3* WT AML.

| Model | Node1                           | Node2                      | P Model* | P Node1 <sup>†</sup> | P Node2 <sup>†</sup> |
|-------|---------------------------------|----------------------------|----------|----------------------|----------------------|
| #1    | AraC+Daunorubicin→cPARP   $U_u$ | FLT3L→p-S6   $\log_2$ fold | 0.046    | 0.033                | 0.034                |
| #2    | Etoposide→cPARP   $U_u$         | FLT3L→p-S6   $\log_2$ fold | 0.038    | 0.037                | 0.022                |

$\log h(t) = \beta_0 + \beta_1 * \text{Node1} + \beta_2 * \text{Node2}$ .

Sample size n = 29 for each row.

\*Wald test used.

<sup>†</sup>t-test( $H_0$ :Slope = 0). Significant p-value suggests influence of model component on hazard ratio.

doi:10.1371/journal.pone.0056714.t006

an interaction term between the node-metric and mutational status. Inclusion of the interaction term was motivated by the difference in range of signaling for a majority of the nodes between *FLT3* ITD and *FLT3* WT samples. Nine of 11 nodes examined were identified to have a significant association ( $p_{\text{Model}} \leq 0.05$ ) with DFS when both node and *FLT3* mutational status were considered (Table 4). Specifically, measurements of FLT3L-induced phosphorylation of S6, PMA-mediated phosphorylation of ERK and S6, Ara-C/Dauno-induced apoptosis, and etoposide-induced apoptosis, each individually, added to *FLT3* mutational status and increased the accuracy of DFS modeling (Table 4, Fig. 7A). These SCNP nodes remained significant ( $p_{\text{Model}} \leq 0.05$ ) when tested with *FLT3* and *NPM1* mutational status together (i.e. molecular classification) as shown in Table 5 and Fig. 7B.

**SCNP nodes likely contribute unique information for the prediction of DFS in *FLT3* WT AML.** FLT3L signaling nodes and apoptosis nodes were both associated with DFS when controlled for *FLT3* mutational status. To assess whether SCNP nodes provided independent information in improving the accuracy of modeling DFS, additional analyses were performed. Specifically, focusing on the *FLT3* WT patients (Fig. 8), (a group of patients with an unmet clinical need for risk of relapse markers since few markers have been validated to associate with DFS in this patient group), the apoptosis node (Etoposide  $\rightarrow$  cPARP using  $U_u$  metric) was combined with the signaling node (FLT3L  $\rightarrow$  pS6 using  $\log_2(\text{Fold})$  metric) using a Cox-proportional hazard regression model for DFS. This model revealed a significant association of both nodes with DFS (Table 6 and Fig. 8). Furthermore, the association between SCNP nodes and DFS remained significant ( $p_{\text{Model}} < 0.05$ ) when accounting for the presence of *NPM1* mutation in the *FLT3* WT group (Table S2). In addition, the SCNP nodes remained significant ( $p_{\text{Model}} < 0.05$ ) (Table S2) after controlling for cytogenetic risk.

## Discussion

Herein, SCNP was used to functionally characterize FLT3 signaling in patients age 60 years or older with AML. In two sequential studies, the homogeneity of FLT3 pathway signaling abnormalities observed in *FLT3* ITD AML samples (compared to normal BM and *FLT3* WT AML) was verified and shown to be correlated with *FLT3* ITD mutational load [27]. Furthermore, the combination of SCNP data with *FLT3* and *NPM1* mutational status improved the accuracy of modeling DFS over that provided by mutation status alone. While the relatively small number of samples analyzed in this hypothesis generating study will necessitate further study in larger sample sets, these findings demonstrate that SCNP provides insights into critical signaling pathways of individual AML cases, information which is potentially clinically relevant. Functional data such as this could ultimately be used to inform post-remission therapy selection and aid in the selection of patients for treatment with inhibitors of signaling pathways.

Ligand binding to the FLT3 receptor initiates a signaling cascade that results in the differential activation of RAS/RAF/MAPK, PI3 kinase, and/or STAT pathways in AML [19,20,21,22,23,24,25,26]. In the current study, although expression levels of FLT3 receptors were similar in the two groups, *FLT3* ITD samples displayed a blunted response to FLT3L modulation (as measured by intracellular levels of p-ERK, p-AKT, p-STAT5 and p-S6) compared to their *FLT3* WT counterparts. These data confirm prior findings [27] and suggest FLT3L-independent signaling in *FLT3* ITD AML.

*FLT3* ITD samples were more sensitive to etoposide-induced *in vitro* apoptosis than *FLT3* WT samples. These data indicate the

presence of an intact apoptotic machinery in *FLT3* ITD samples and suggest their increased *in vitro* susceptibility to continuous exposure of apoptosis-inducing drugs. While these data may seem counter-intuitive based on the poor survival prognosis associated with *FLT3* ITD AML, *FLT3* ITD has been reported to be associated with increased reactive oxygen species and with susceptibility to double-stranded DNA breaks with inaccurate but permissive repair [53,54]. These impaired repair mechanisms and resultant genomic instability lead to increased apoptosis in the majority of cells but allow for increased survival of *FLT3* ITD myeloblasts which eventually cause disease relapse.

The variance in signaling was observed to be the largest in the *FLT3* WT group followed by *FLT3* ITD AML in increasing order of mutational load. The impact of *FLT3* mutational load has been evaluated in several studies but has not yet been standardized for application in clinical practice. A high ratio of the ITD allele compared to the WT allele or a high percentage of *FLT3* ITD mutation confers unfavorable prognosis, and multivariate analysis has shown allelic burden to be an independent prognostic factor for worse overall survival (OS) and DFS [2,4,12,13]. Furthermore, *FLT3* ITD/*FLT3* WT ratios of 0.5 or higher in the context of mutated *NPM1* have an adverse impact on both event-free survival and OS [13]. Of note, while the thresholds used for the calculation of the impact on survival varied in each of the studies [2,4,12], our data shows homogeneity of signaling in AML samples starting with  $\sim 40\%$  *FLT3* ITD (Fig. 2), a value currently used to define high risk status in pediatric AML by the Childrens Oncology Group [55].

PCA analysis that combined information across multiple SCNP nodes showed distinct clusters in healthy BMMb and *FLT3* ITD AML (with mutation load  $>40\%$ ), suggesting that these cell types have tightly regulated distinct signaling pathways. Conversely, *FLT3* WT AML samples demonstrated diffusely scattered heterogeneous signaling patterns. These data suggest that prognostication based on similarities in FLT3 receptor signaling may be equally, and if used in modeling, potentially even more informative than molecular characterization and mutational load alone.

Finally, the observation that SCNP nodes from multiple pathways were found to be independent and yet significantly associated with DFS in the subgroup of patients lacking *FLT3* receptor and *NPM1* mutations (a subset of patients in need of markers associated with disease relapse) is of note and warrants further investigation in a larger patient cohort. In summary, this work demonstrates the potential utility of combining SCNP measurements of disease-relevant signal transduction pathways with molecular characterization to yield improved accuracy of DFS predictions in AML samples compared to predictions from molecular characterization alone. These results emphasize the value of comprehensive functional assessment of biologically relevant signaling pathways in AML as a basis for the development of highly predictive tests for guidance of post-remission therapy, including treatment with agents interfering with the FLT3 signaling pathway.

## Supporting Information

**Figure S1 Metrics Overview.** (A) Overview of SCNP metrics based on ERF values. (B) The  $U_u$  metric compares the ERF values of the modulated and unmodulated wells that has been scaled to the unit interval (0,1).  $U_a$  is the same as the  $U_u$  metric except for the autofluorescence control is used as the reference instead of the unmodulated well. (TIFF)

**Table S1 List of experimental conditions and reagents used.** (A) List of modulators and technical conditions used. (B).List of antibodies and reagents used. (TIFF)

**Table S2 *NPM1* mutational status does not account for association between SCNP nodes and DFS among *FLT3* WT donors.** (TIFF)

## Acknowledgments

We thank all patients who have donated samples for this investigation and Williamson Medical Center for providing the healthy BMNC samples for

## References

- Krause DS, Van Etten RA (2005) Tyrosine kinases as targets for cancer therapy. *N Engl J Med* 353: 172–187.
- Whitman SP, Archer KJ, Feng L, Baldus C, Becknell B, et al. (2001) Absence of the wild-type allele predicts poor prognosis in adult de novo acute myeloid leukemia with normal cytogenetics and the internal tandem duplication of *FLT3*: a cancer and leukemia group B study. *Cancer Res* 61: 7233–7239.
- Kottaridis PD, Gale RE, Frew ME, Harrison G, Langabeer SE, et al. (2001) The presence of a *FLT3* internal tandem duplication in patients with acute myeloid leukemia (AML) adds important prognostic information to cytogenetic risk group and response to the first cycle of chemotherapy: analysis of 854 patients from the United Kingdom Medical Research Council AML 10 and 12 trials. *Blood* 98: 1752–1759.
- Thiede C, Stuedel C, Mohr B, Schaich M, Schakel U, et al. (2002) Analysis of *FLT3*-activating mutations in 979 patients with acute myelogenous leukemia: association with FAB subtypes and identification of subgroups with poor prognosis. *Blood* 99: 4326–4335.
- Frohling S, Schlenk RF, Breitruck J, Benner A, Kreitmeier S, et al. (2002) Prognostic significance of activating *FLT3* mutations in younger adults (16 to 60 years) with acute myeloid leukemia and normal cytogenetics: a study of the AML Study Group Ulm. *Blood* 100: 4372–4380.
- Gale RE, Hills R, Kottaridis PD, Srirangan S, Wheatley K, et al. (2005) No evidence that *FLT3* status should be considered as an indicator for transplantation in acute myeloid leukemia (AML): an analysis of 1135 patients, excluding acute promyelocytic leukemia, from the UK MRC AML10 and 12 trials. *Blood* 106: 3658–3665.
- Beran M, Luthra R, Kantarjian H, Estey E (2004) *FLT3* mutation and response to intensive chemotherapy in young adult and elderly patients with normal karyotype. *Leuk Res* 28: 547–550.
- Meshinchi S, Woods WG, Stirewalt DL, Sweetser DA, Buckley JD, et al. (2001) Prevalence and prognostic significance of *Ft3* internal tandem duplication in pediatric acute myeloid leukemia. *Blood* 97: 89–94.
- Kondo M, Horibe K, Takahashi Y, Matsumoto K, Fukuda M, et al. (1999) Prognostic value of internal tandem duplication of the *FLT3* gene in childhood acute myelogenous leukemia. *Med Pediatr Oncol* 33: 525–529.
- Iwai T, Yokota S, Nakao M, Okamoto T, Taniwaki M, et al. (1999) Internal tandem duplication of the *FLT3* gene and clinical evaluation in childhood acute myeloid leukemia. *Leukemia* 13: 38–43.
- Kindler T, Lipka DB, Fischer T (2010) *FLT3* as a therapeutic target in AML: still challenging after all these years. *Blood* 116: 5089–5102.
- Gale RE, Green C, Allen C, Mead AJ, Burnett AK, et al. (2008) The impact of *FLT3* internal tandem duplication mutant level, number, size, and interaction with *NPM1* mutations in a large cohort of young adult patients with acute myeloid leukemia. *Blood* 111: 2776–2784.
- Schnitger S, Bacher U, Kern W, Alpermann T, Haferlach C, et al. (2011) Prognostic impact of *FLT3*-ITD load in *NPM1* mutated acute myeloid leukemia. *Leukemia* : official journal of the Leukemia Society of America, Leukemia Research Fund, UK 25: 1297–1304.
- Falini B, Mecucci C, Tiacci E, Alcalay M, Rosati R, et al. (2005) Cytoplasmic nucleophosmin in acute myelogenous leukemia with a normal karyotype. *N Engl J Med* 352: 254–266.
- Thiede C, Koch S, Creutzig E, Stuedel C, Illmer T, et al. (2006) Prevalence and prognostic impact of *NPM1* mutations in 1485 adult patients with acute myeloid leukemia (AML). *Blood* 107: 4011–4020.
- Becker H, Marcucci G, Maharry K, Radmacher MD, Mrozek K, et al. (2010) Favorable prognostic impact of *NPM1* mutations in older patients with cytogenetically normal de novo acute myeloid leukemia and associated gene- and microRNA-expression signatures: a Cancer and Leukemia Group B study. *J Clin Oncol* 28: 596–604.
- Estey EH (2012) Acute myeloid leukemia: 2012 update on diagnosis, risk stratification, and management. *American journal of hematology* 87: 89–99.
- Patel JP, Gonen M, Figueroa ME, Fernandez H, Sun Z, et al. (2012) Prognostic relevance of integrated genetic profiling in acute myeloid leukemia. *N Engl J Med* 366: 1079–1089.
- Dosil M, Wang S, Lemischka IR (1993) Mitogenic signalling and substrate specificity of the *Ftk2/Ftk3* receptor tyrosine kinase in fibroblasts and interleukin 3-dependent hematopoietic cells. *Mol Cell Biol* 13: 6572–6585.
- Hayakawa F, Towatari M, Kiyoi H, Tanimoto M, Kitamura T, et al. (2000) Tandem-duplicated *Ftk3* constitutively activates *STAT5* and *MAP kinase* and introduces autonomous cell growth in *IL-3*-dependent cell lines. *Oncogene* 19: 624–631.
- Lavagna-Sevenier C, Marchetto S, Birnbaum D, Rosnet O (1998) *FLT3* signaling in hematopoietic cells involves *CBL*, *SHC* and an unknown *P115* as prominent tyrosine-phosphorylated substrates. *Leukemia* 12: 301–310.
- Mizuki M, Fenski R, Halfter H, Matsumura I, Schmidt R, et al. (2000) *Ftk3* mutations from patients with acute myeloid leukemia induce transformation of 32D cells mediated by the *Ras* and *STAT5* pathways. *Blood* 96: 3907–3914.
- Rottapel R, Turck CW, Casteran N, Liu X, Birnbaum D, et al. (1994) Substrate specificities and identification of a putative binding site for *PI3K* in the carboxy tail of the murine *Ftk3* receptor tyrosine kinase. *Oncogene* 9: 1755–1765.
- Zhang S, Fukuda S, Lee Y, Hangoc G, Cooper S, et al. (2000) Essential role of signal transducer and activator of transcription (*Stat5a*) but not *Stat5b* for *Ftk3*-dependent signaling. *J Exp Med* 192: 719–728.
- Zhang S, Mantel C, Broxmeyer HE (1999) *Ftk3* signaling involves tyrosyl-phosphorylation of *SHP-2* and *SHIP* and their association with *Grb2* and *Shc* in *Baf3/Ftk3* cells. *J Leukoc Biol* 65: 372–380.
- Choudhary C, Muller-Tidow C, Berdel WE, Serve H (2005) Signal transduction of oncogenic *Ftk3*. *International Journal of Hematology* 82: 93–99.
- Rosen DB, Minden MD, Kornblau SM, Cohen A, Gayko U, et al. (2010) Functional characterization of *FLT3* receptor signaling deregulation in acute myeloid leukemia by single cell network profiling (SCNP). *PLoS ONE* 5: e13543.
- Cripe LD, Li X, Litow M, Paietta E, Rowe JM, et al. (2006) A Randomized, Placebo-Controlled, Double Blind Trial of the MDR Modulator, Zosuquidar, during Conventional Induction and Post-Remission Therapy for Pts >60 Years of Age with Newly Diagnosed Acute Myeloid Leukemia (AML) or High-Risk Myelodysplastic Syndrome (HR-MDS): ECOG 3999. *ASH Annual Meeting Abstracts* 108: 423.
- Rowe JM, Neuberg D, Friedenber W, Bennett JM, Paietta E, et al. (2004) A phase 3 study of three induction regimens and of priming with GM-CSF in older adults with acute myeloid leukemia: a trial by the Eastern Cooperative Oncology Group. *Blood* 103: 479–485.
- Rosen DB, Putta S, Covey T, Huang YW, Nolan GP, et al. (2010) Distinct patterns of DNA damage response and apoptosis correlate with *Jak/Stat* and *PI3K* response profiles in human acute myelogenous leukemia. *PLoS ONE* 5: e12405.
- Kornblau SM, Minden MD, Rosen DB, Putta S, Cohen A, et al. (2010) Dynamic single-cell network profiles in acute myelogenous leukemia are associated with patient response to standard induction therapy. *Clin Cancer Res* 16: 3721–3733.
- Cheong JW, Eom JI, Maeng HY, Lee ST, Hahn JS, et al. (2003) Phosphatase and tensin homologue phosphorylation in the C-terminal regulatory domain is frequently observed in acute myeloid leukaemia and associated with poor clinical outcome. *Br J Haematol* 122: 454–456.
- Yilmaz OH, Valdez R, Theisen BK, Guo W, Ferguson DO, et al. (2006) Pten dependence distinguishes haematopoietic stem cells from leukaemia-initiating cells. *Nature* 441: 475–482.
- Scholl C, Gilliland DG, Frohling S (2008) Deregulation of Signaling Pathways in Acute Myeloid Leukemia. *Seminars in Oncology* 35: 336–345.
- Lyman SD, Jacobsen SE (1998) *c-kit* ligand and *Ftk3* ligand: stem/progenitor cell factors with overlapping yet distinct activities. *Blood* 91: 1101–1134.
- Kikushige Y, Yoshimoto G, Miyamoto T, Iino T, Mori Y, et al. (2008) Human *Ftk3* is expressed at the hematopoietic stem cell and the granulocyte/macrophage progenitor stages to maintain cell survival. *J Immunol* 180: 7358–7367.
- Benckli M, Xia Z, Donohue KA, Ford LA, Pixley LA, et al. (2002) Constitutive activity of signal transducer and activator of transcription 3 protein in acute

this study. We thank all Nodality staff and Garry P. Nolan for overall contribution to SCNP technology advancements and Samantha Kubeck and Michelle Atallah for manuscript formatting.

## Author Contributions

Conceived and designed the experiments: AC SP DBR UG LC EP. Performed the experiments: DBR JW KM. Analyzed the data: AC SP DBR ACC UG REH ZS EP JW KM. Contributed reagents/materials/analysis tools: EP LC ZS MST. Wrote the paper: AC SP DBR ACC UG REH LC ZS MST EP.

- myeloid leukemia blasts is associated with short disease-free survival. *Blood* 99: 252–257.
38. Benekli M, Baer MR, Baumann H, Wetzler M (2003) Signal transducer and activator of transcription proteins in leukemias. *Blood* 101: 2940–2954.
  39. Baker SJ, Rane SG, Reddy EP (2007) Hematopoietic cytokine receptor signaling. *Oncogene* 26: 6724–6737.
  40. Bunting KD (2007) STAT5 signaling in normal and pathologic hematopoiesis. *Front Biosci* 12: 2807–2820.
  41. Hanahan D, Weinberg RA (2011) Hallmarks of cancer: the next generation. *Cell* 144: 646–674.
  42. Stelzer GT, Goodpasture L (2000) Use of multiparameter flow cytometry and immunophenotyping for the diagnosis and classification of acute myeloid leukemia. In: Stewart CC, Nicholson JKA, editors. *Immunophenotyping*. Wilmington DE: Wiley-Liss, pp. 215–238.
  43. Cesano A, Putta S, Gayko U, Hackett J, Rosen DB, et al. (2010) Single-Cell Network Profiling (SCNP) Signatures Independently Predict Response to Induction Therapy In Older Patients with Acute Myeloid Leukemia (AML). *ASH Annual Meeting Abstracts* 116: 2695-.
  44. Cesano A, Rosen DB, O'Meara P, Putta S, Gayko U, et al. (2012) Functional pathway analysis in acute myeloid leukemia using single cell network profiling assay: effect of specimen source (bone marrow or peripheral blood) on assay readouts. *Cytometry Part B, Clinical cytometry* 82: 158–172.
  45. Shults KE, Miller DT, Davis BH, Flye L, Hobbs LA, et al. (2006) A standardized ZAP-70 assay—lessons learned in the trenches. *Cytometry B Clin Cytom* 70: 276–283.
  46. Purvis N, Stelzer G (1998) Multi-platform, multi-site instrumentation and reagent standardization. *Cytometry* 33: 156–165.
  47. Wang L, Gaigalas AK, Marti G, Abbasi F, Hoffman RA (2008) Toward quantitative fluorescence measurements with multicolor flow cytometry. *Cytometry A* 73: 279–288.
  48. Kiyoi H, Naoe T, Nakano Y, Yokota S, Minami S, et al. (1999) Prognostic implication of *FLT3* and *N-RAS* gene mutations in acute myeloid leukemia. *Blood* 93: 3074–3080.
  49. Gorello P, Cazzaniga G, Alberti F, Dell'Oro MG, Gottardi E, et al. (2006) Quantitative assessment of minimal residual disease in acute myeloid leukemia carrying nucleophosmin (*NPM1*) gene mutations. *Leukemia* 20: 1103–1108.
  50. Jolliffe IT (2002) *Principal Component Analysis*. Springer, NY. 487 p.
  51. Grimwade D, Walker H, Harrison G, Oliver F, Chatters S, et al. (2001) The predictive value of hierarchical cytogenetic classification in older adults with acute myeloid leukemia (AML): analysis of 1065 patients entered into the United Kingdom Medical Research Council AML11 trial. *Blood* 98: 1312–1320.
  52. O'Donnell MR, Abboud CN, Altman JK, Appelbaum FR, Arber DA, et al. (2012) *NCCN Clinical Practice Guidelines in Oncology: Acute Myeloid Leukemia*. In: Network NCC, editor. Version 2.2012 ed.
  53. Sallmyr A, Fan J, Datta K, Kim KT, Grosu D, et al. (2008) Internal tandem duplication of *FLT3* (*FLT3/ITD*) induces increased ROS production, DNA damage, and misrepair: implications for poor prognosis in AML. *Blood* 111: 3173–3182.
  54. Fan J, Li L, Small D, Rassool F (2010) Cells expressing *FLT3/ITD* mutations exhibit elevated repair errors generated through alternative NHEJ pathways: implications for genomic instability and therapy. *Blood* 116: 5298–5305.
  55. Brown P, Meshinchi S, Levis M, Alonzo TA, Gerbing R, et al. (2004) Pediatric AML primary samples with *FLT3/ITD* mutations are preferentially killed by *FLT3* inhibition. *Blood* 104: 1841–1849.
